# Supplementary material for: Macrophages induce “budding” in aggressive human colon cancer subtypes by protease-mediated disruption of tight junctions
Source: PubMed Central journal article supplement (PMC5929404; doi:10.18632/oncotarget.24626), 2018-04-13
Supplement: oncotarget-09-19490-s001.pdf [file oncotarget-09-19490-s001.pdf]

# Macrophages induce “budding” in aggressive human colon cancer subtypes by protease-mediated disruption of tight junctions

## SUPPLEMENTARY MATERIALS

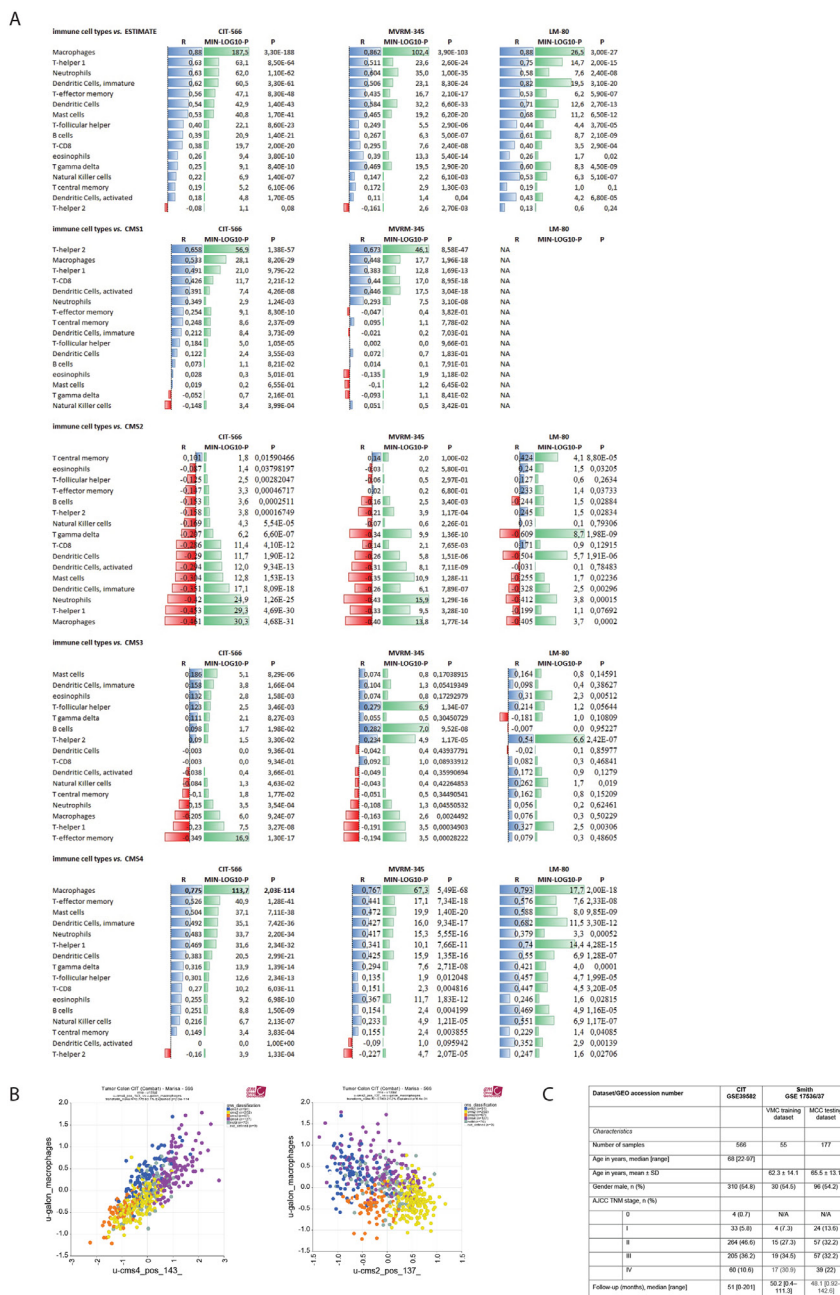

**Supplementary Figure 1: Immune cell gene signatures in CMS subtypes.** (A) For each immune cell gene signature, the meta-gene values were generated and stored as a separate track. These tracks were subsequently compared 1 by 1 in exactly the same manner as one would compare the expression of two genes in a tumor cohort. One way analysis of variance (ANOVA) was then used to assess significance of the correlation and xy plots were generated for all track-track correlations. An overview of the correlation R-values belonging to each xy-plot is shown, accompanied by p-values (−LOG10-transformed). (B) Examples of the correlation xy-plots for the macrophage gene signature in CMS4 (strong positive correlation) and CMS2 (strong negative correlation). The CMS subtypes are color-coded as indicated in the legend. (C) Characteristics of the CIT-566 and Smith-232 cohorts.

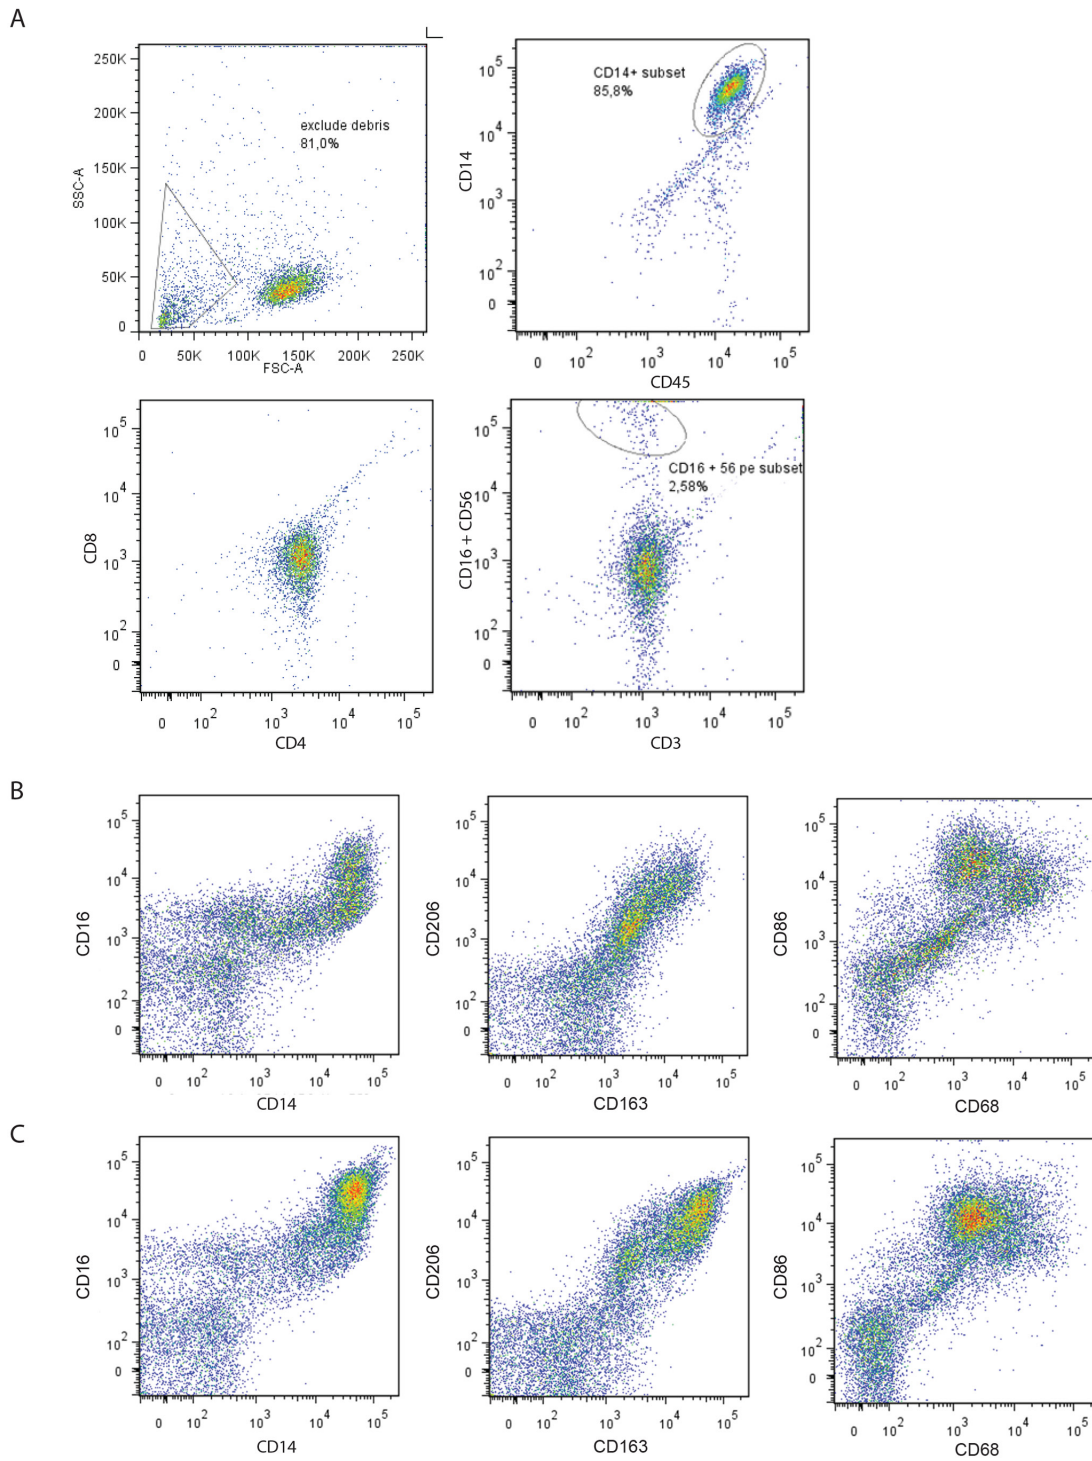

**Supplementary Figure 2: Macrophage polarization with IL-10. (A)** Isolation of CD14 positive monocytes from PBMCs. **(B)** CD-marker expression after 8 days of M-CSF stimulation. **(C)** CD-marker expression after 8 days of M-CSF stimulation and 48 hours of IL-10 stimulation.

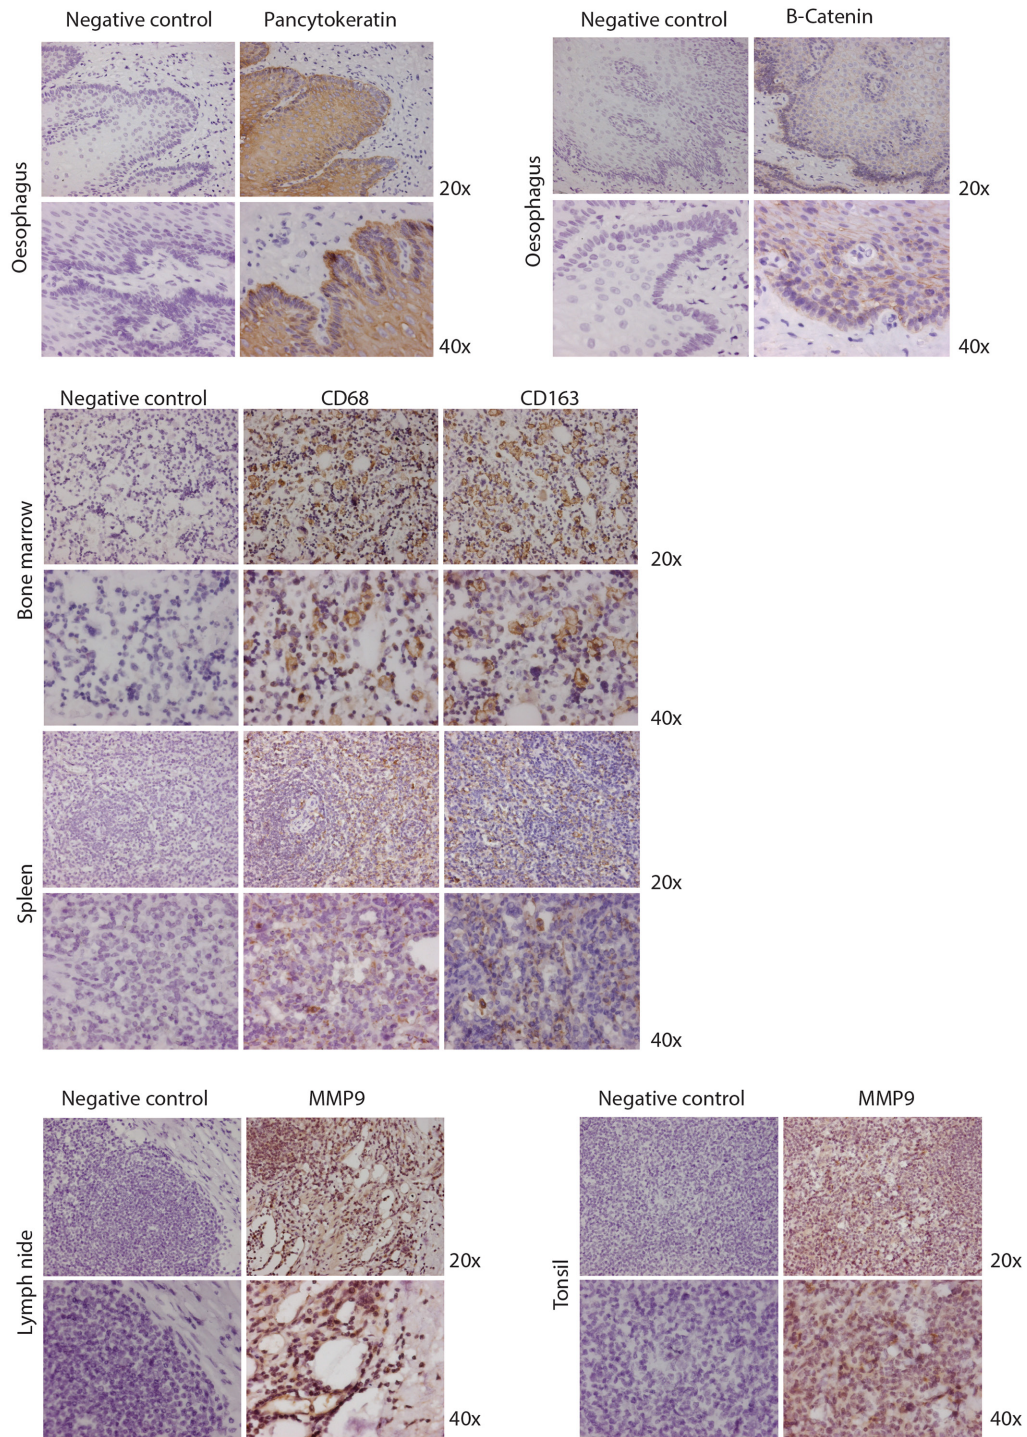

**Supplementary Figure 3: Positive and negative controls immunohistochemical stainings.** Overview of the negative and positive controls for the immunohistochemistry stainings of Pancytokeratin, b-Catenin, CD68 and CD163, 20x and 40x magnification.

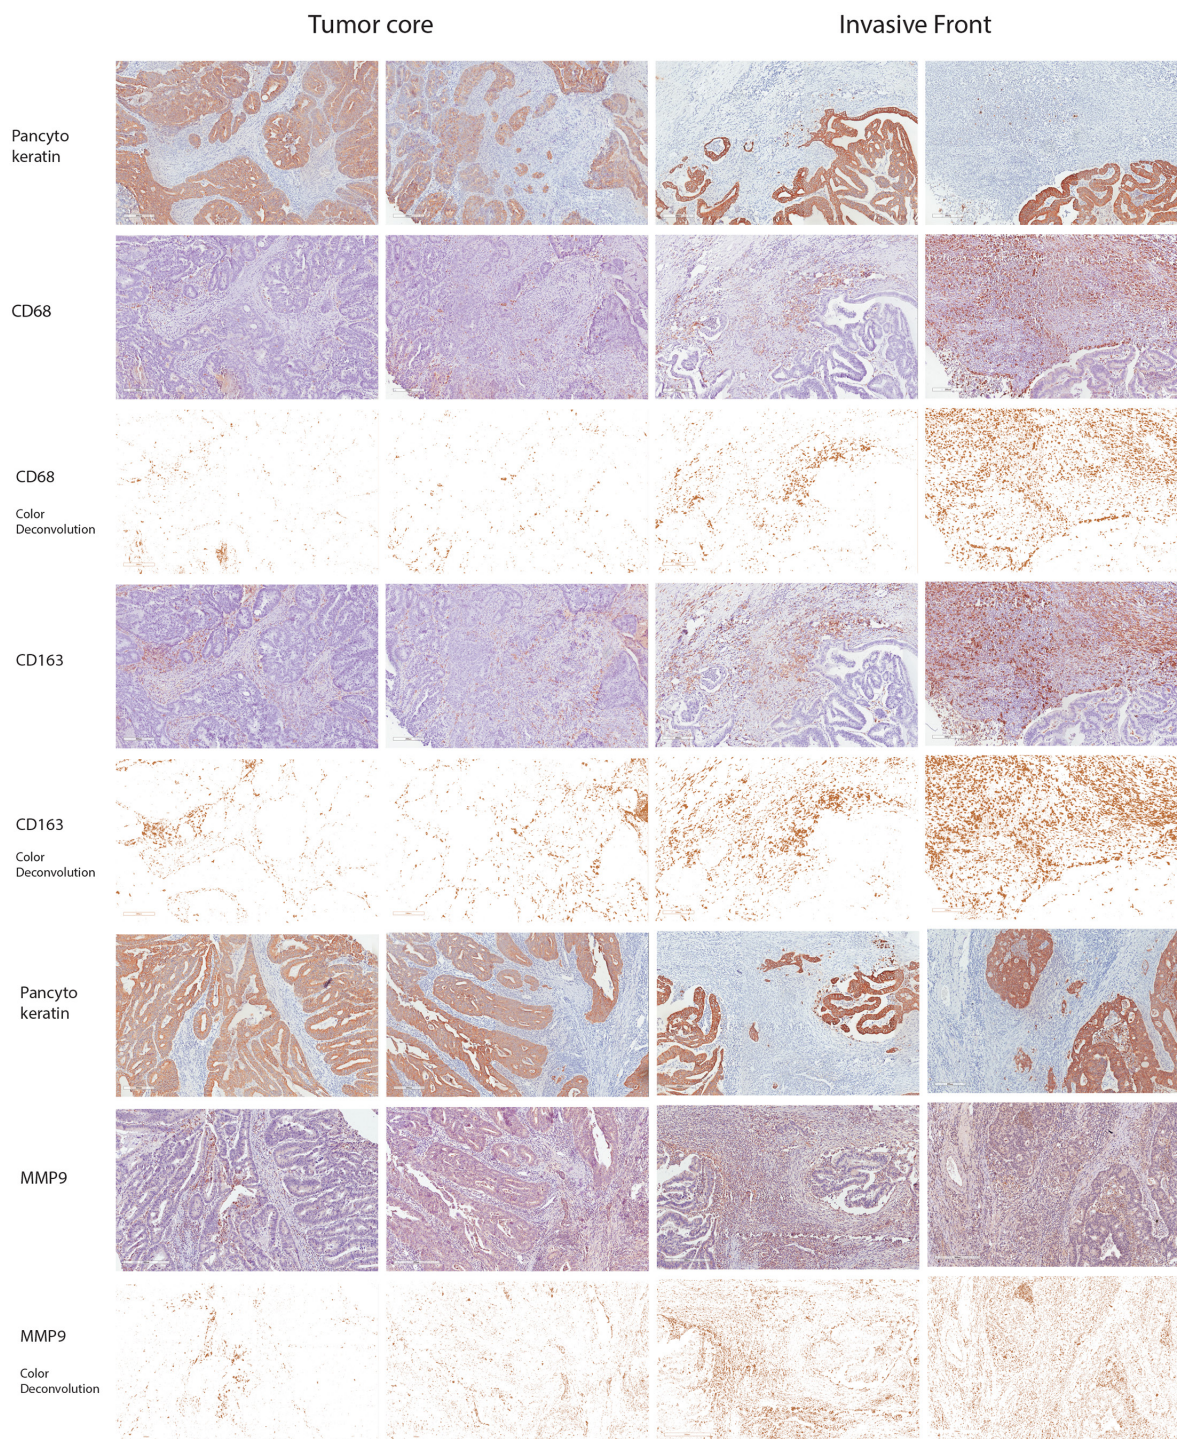

**Supplementary Figure 4: Immunohistochemical stainings - Color Deconvolution Method.** Examples of stainings where the image program Fiji/ImageJ was used for Color Deconvolution (Vector: H DAB). All images are a 5x magnification.

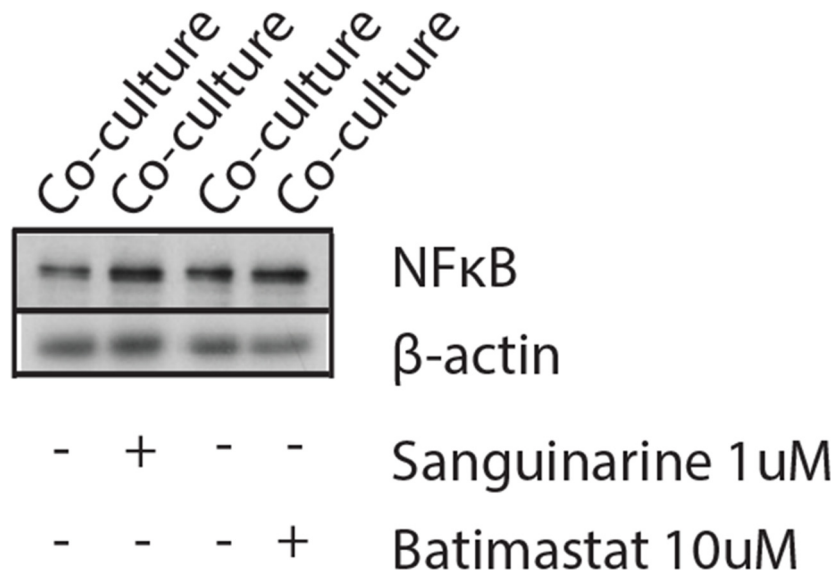

**Supplementary Figure 5: M2 + L145 Co-culture Protein levels NFκB.** Western blot showing co-culture protein levels of NFκB unaffected by treatment with Sanguinarine 1 μM and Batimastat 10 μM for 48 hours.
